# Supplementary material for: Adsorption and Release of Rose Bengal on Layer-by-Layer Films of Poly(Vinyl Alcohol) and Poly(Amidoamine) Dendrimers Bearing 4-Carboxyphenylboronic Acid
Source: Polymers (Basel). 2020 Aug 18;12(8):1854. doi: 10.3390/polym12081854 (PMC7465977; doi:10.3390/polym12081854)
Supplement: Supplementary file 1 [file polymers-12-01854-s001.pdf]

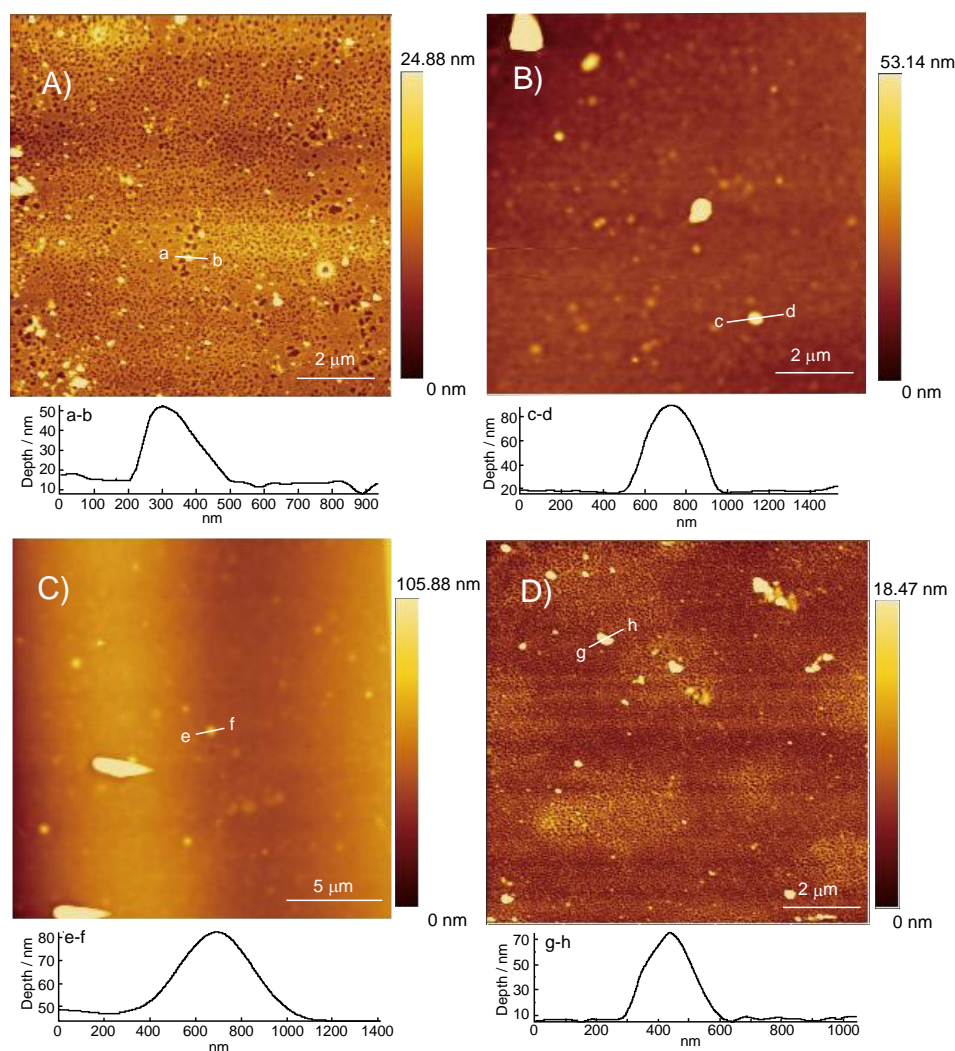

**Figure S11.** AFM images and corresponding cross-section profile of (A) one-, (B) three-, (C) five-bilayer-thick (PBA-PAMAM/PVA)<sub>n</sub> films. In the AFM image of (D), the (PBA-PAMAM/PVA)<sub>5</sub> film was immersed in a 10 mM H<sub>2</sub>O<sub>2</sub> solution (pH 7) for 15 min, rinsed with purified water, and dried in a desiccator.

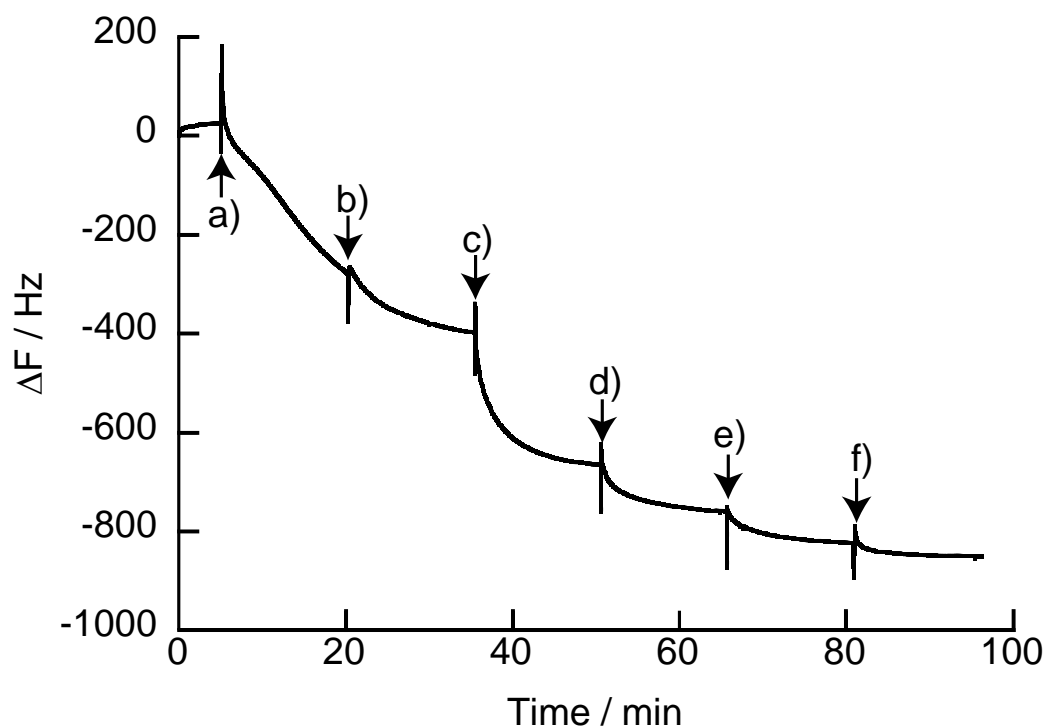

**Figure SI2.** Frequency change when the (PB-PAMAM/PVA)<sub>5</sub> film is immersed in RB solutions (0.1 mg/mL) with various pHs. The LbL films were immersed in RB solutions with (a) pH9, (b) pH 8, (c) pH 7, (d) pH 6, (e) pH 5 and (f) pH 6.

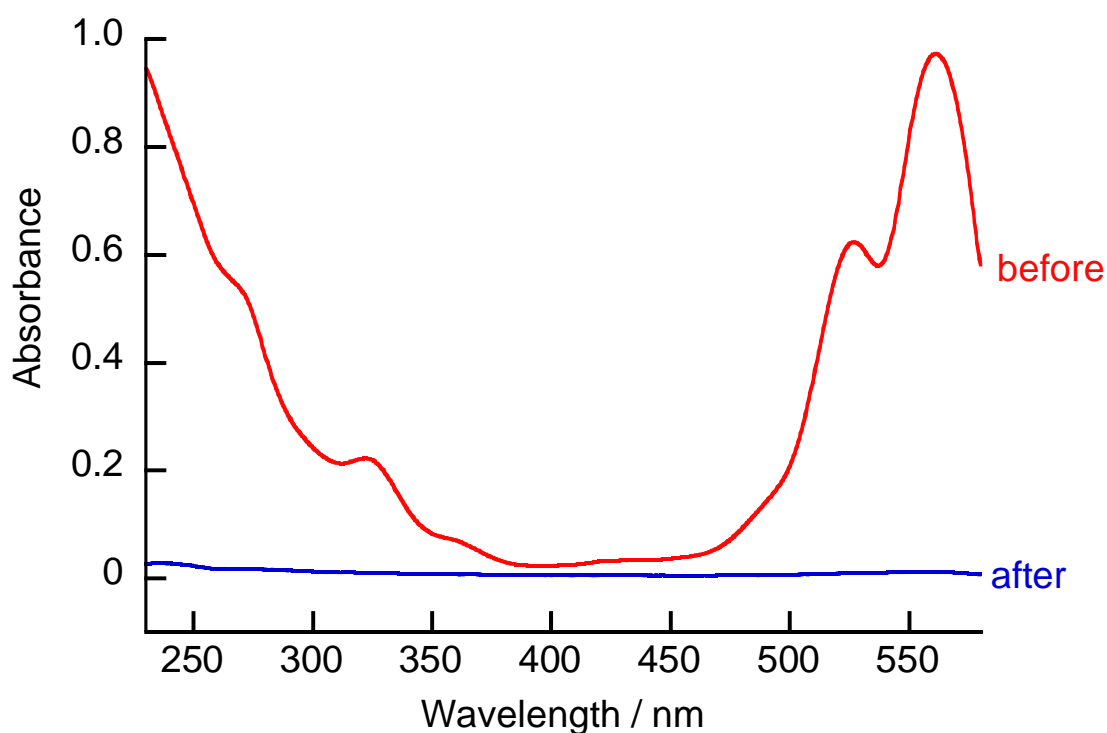

**Figure SI3.** UV-vis absorption spectra of RB-adsorbed (PBA-PAMAM/PVA)<sub>5</sub> film before and after immersion in H<sub>2</sub>O<sub>2</sub> solution. The (PBA-PAMAM/PVA)<sub>5</sub> film was immersed in RB solution at pH 7 for RB adsorption to the LbL film. The RB-adsorbed (PBA-PAMAM/PVA)<sub>5</sub> film was immersed in 100 mM H<sub>2</sub>O<sub>2</sub> solution at pH 9.

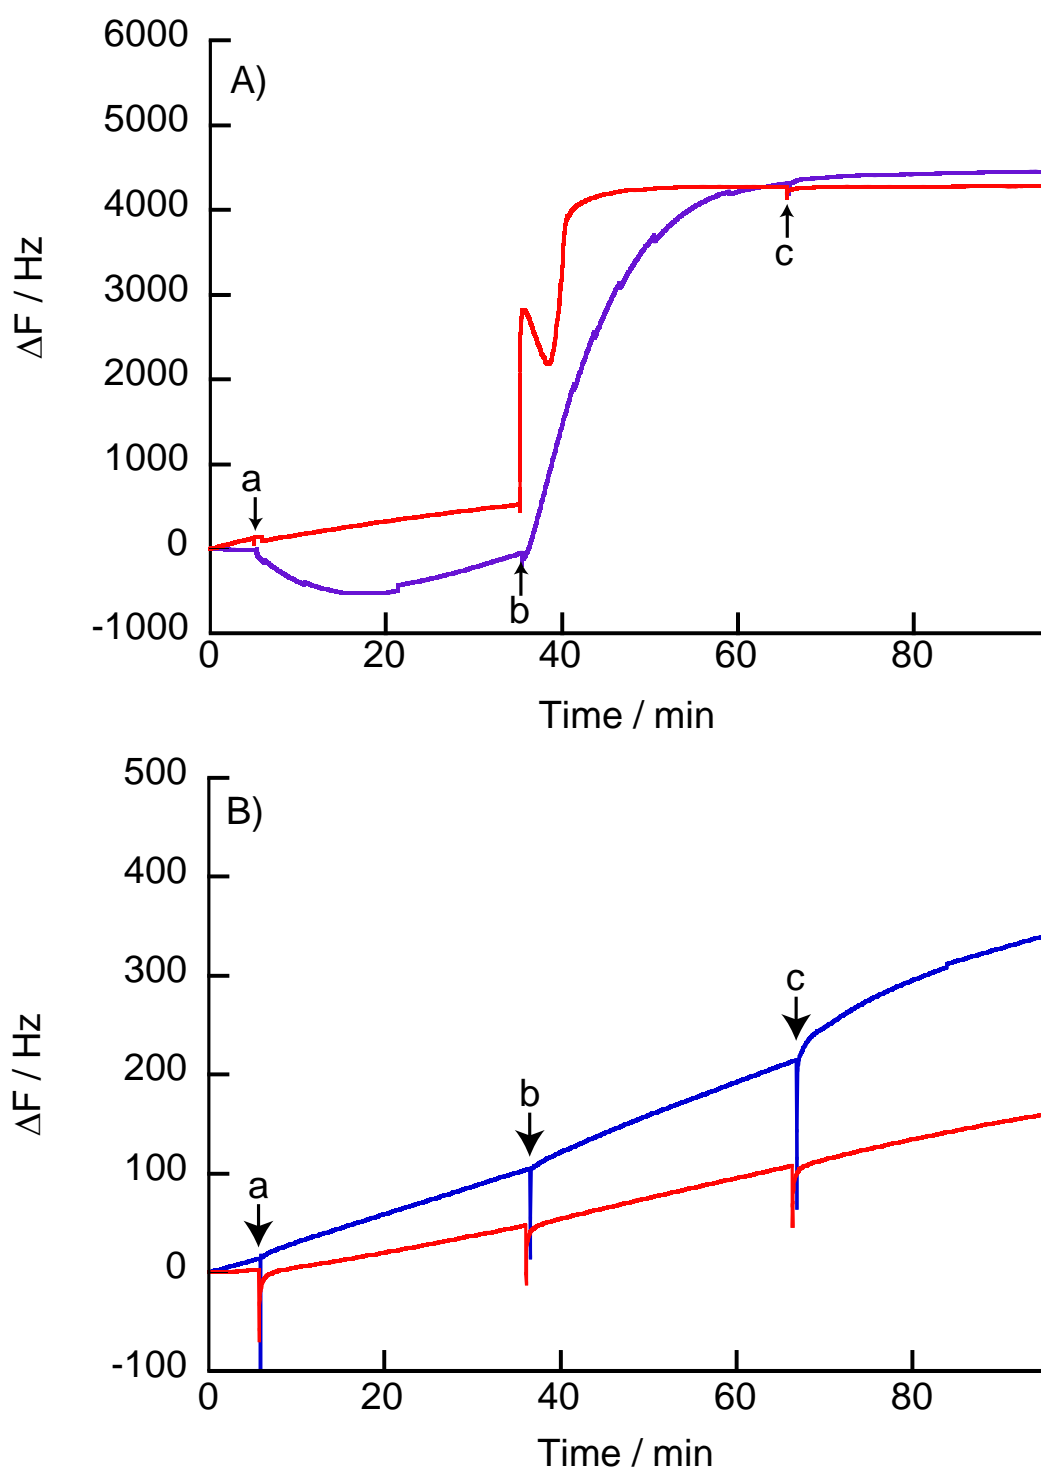

**Figure SI4.** Frequency change when (A) the (PBA-PAMAM/PVA)<sub>5</sub> film and (B) RB adsorbed-(PBA-PAMAM/PVA)<sub>5</sub> film are immersed in various  $H_2O_2$  solution at pH 7 (blue line) and pH 4 (red line).  $H_2O_2$  solutions was working buffer containing (a) 1, (b) 10, and (c) 100 mM  $H_2O_2$ .

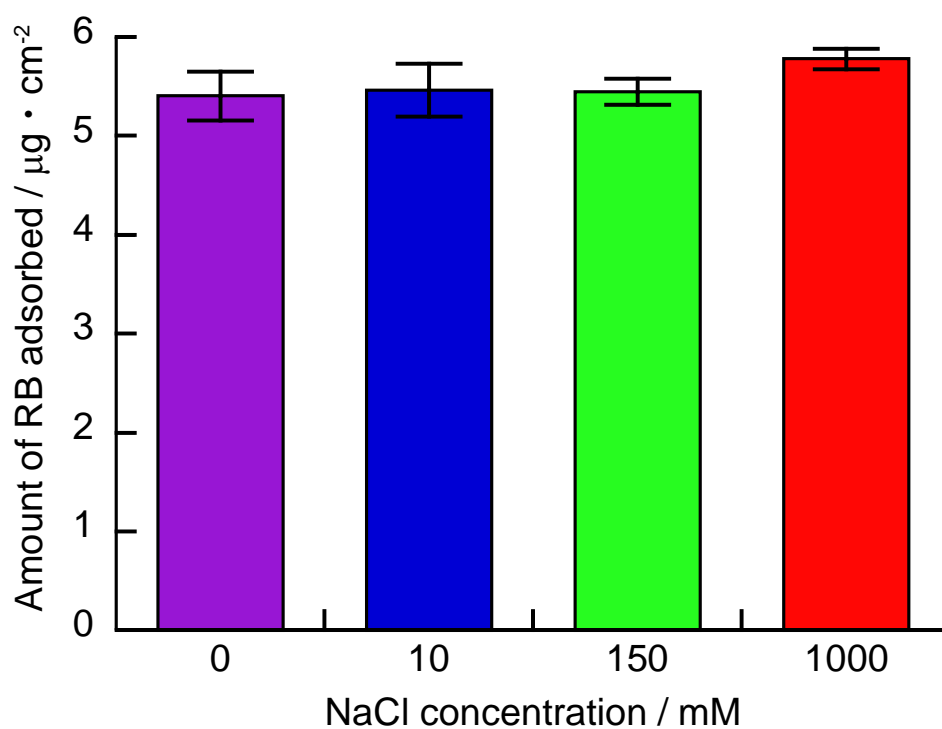

**Figure SI5.** Amount of RB adsorbed on (PBA-PAMAM/PVA)<sub>5</sub> films after immersion in RB solution with various NaCl concentrations.

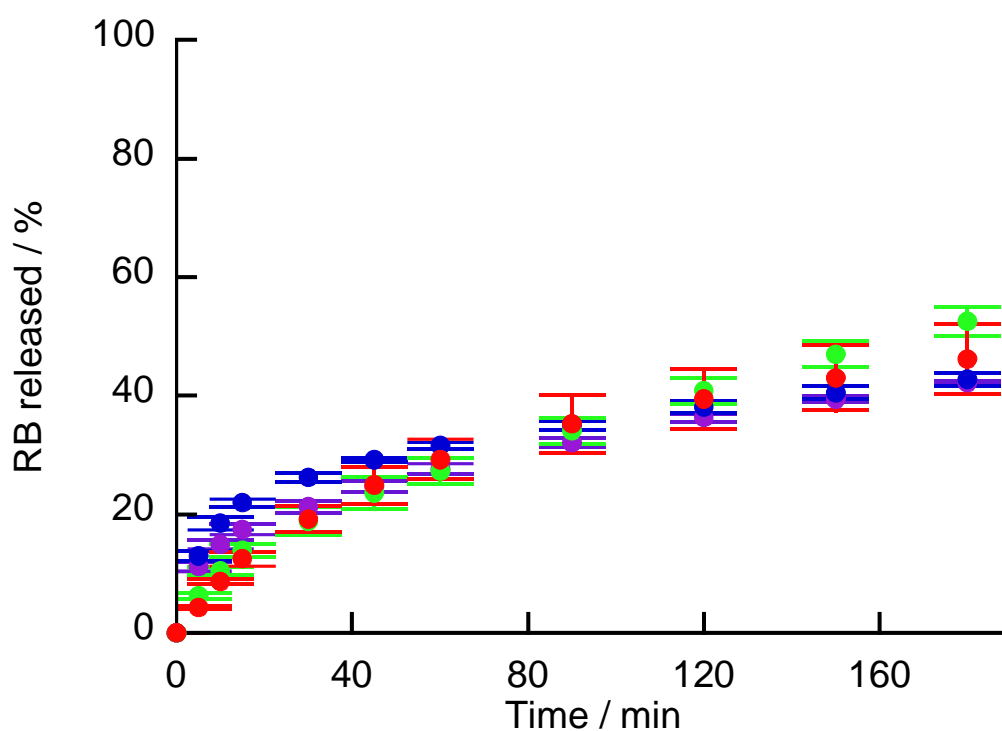

**Figure SI6.** RB released from (PBA-PAMAM/PVA)<sub>5</sub> films immersed in buffers with various NaCl concentrations. The H<sub>2</sub>O<sub>2</sub> solutions were working buffer (pH 7) with 0 (purple), 1 (blue), 10 (green), and 100 mM (red) NaCl.
